# Supplementary material
Source: ML conference proceedings conference paper supplement (https://openreview.net/forum?id=KQ5jI19kF3)
Supplement: supplementary_material [file attachment]

log of minimal sample regret

Six-Hump Camel (dimension: 2)

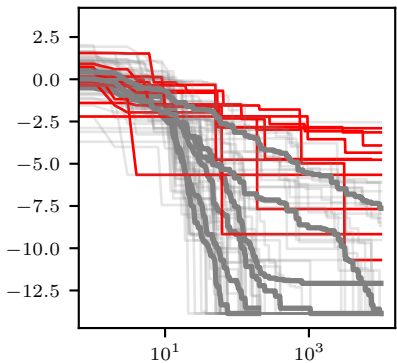

Dixon-Price (dimension: 10)

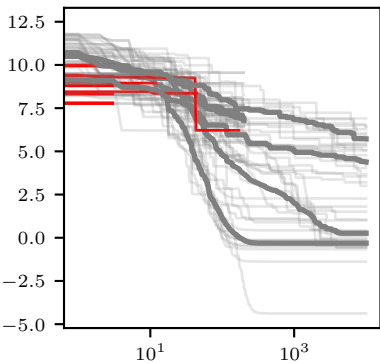

Branin (dimension: 2)

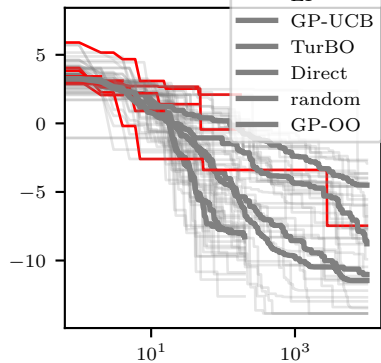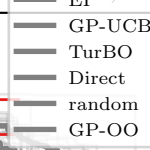

Beale (dimension: 2)

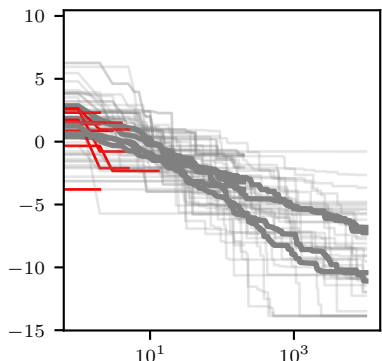

Bohachevsky A (dimension: 2)

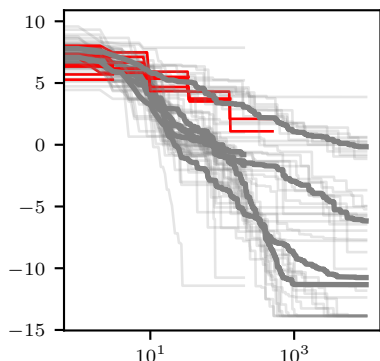

Bohachevsky B (dimension: 2)

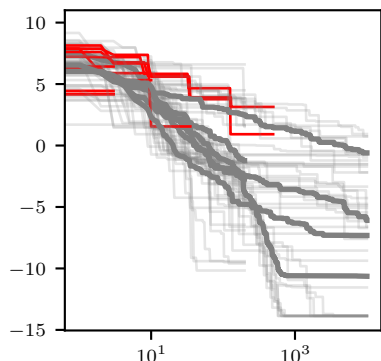

Bohachevsky C (dimension: 2)

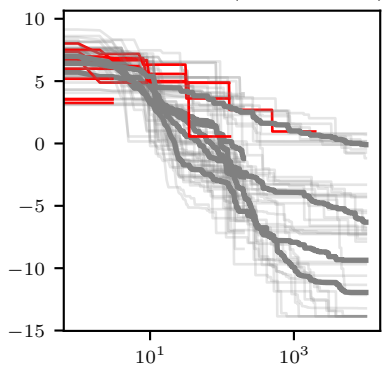

Rosenbrock (dimension: 2)

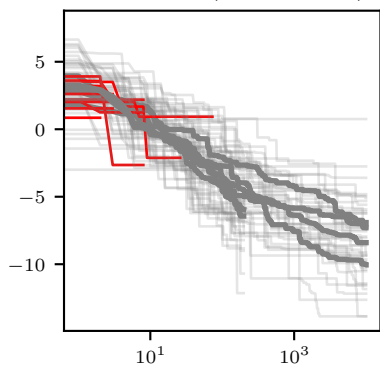

Ackley (dimension: 2)

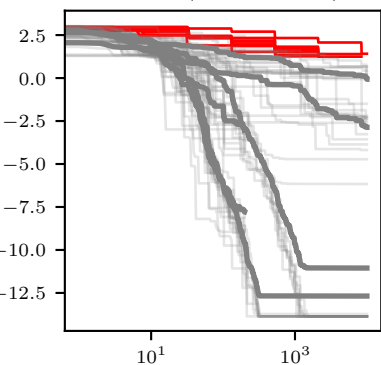

Hartmann (dimension: 3)

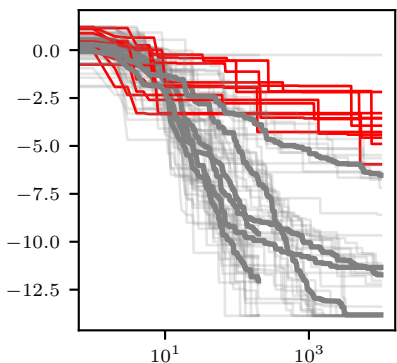

Trid (dimension: 4)

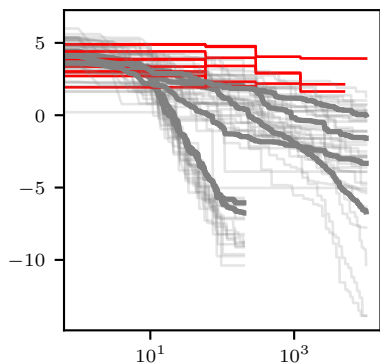

Shekel (dimension: 4)

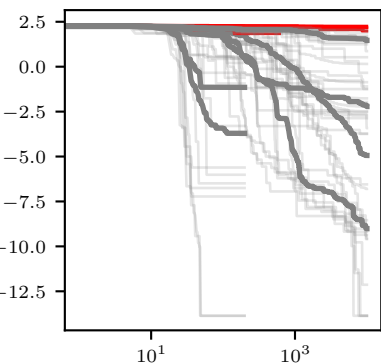

number of function evaluations
