# Supplementary material
Source: ML conference proceedings conference paper supplement (https://openreview.net/forum?id=KQ5jI19kF3)

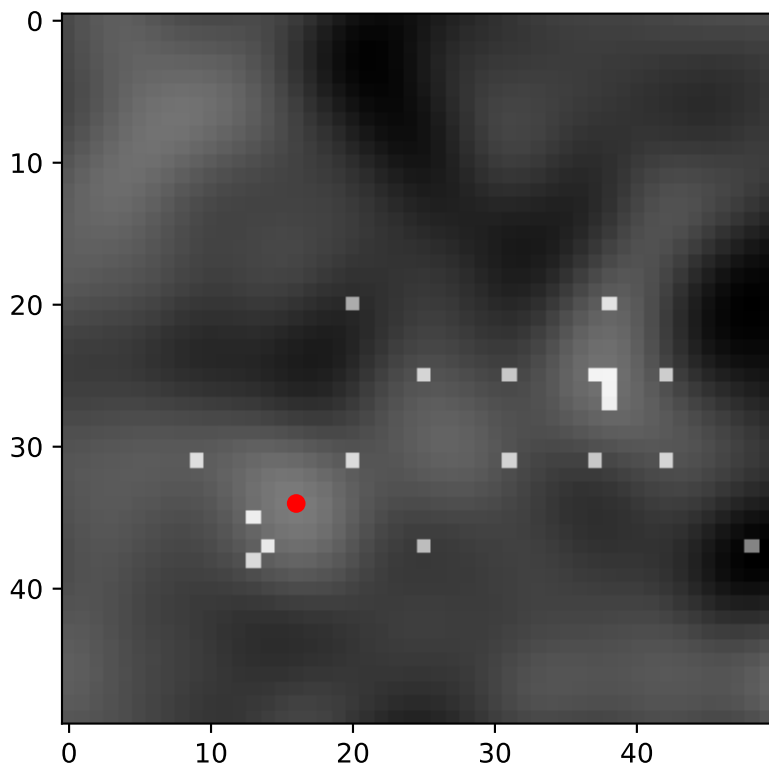

Supplement: supplementary_material [file attachment]

square exponential 0.2

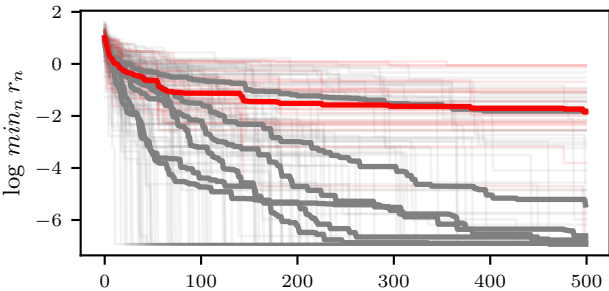number of function evaluations  $n$ 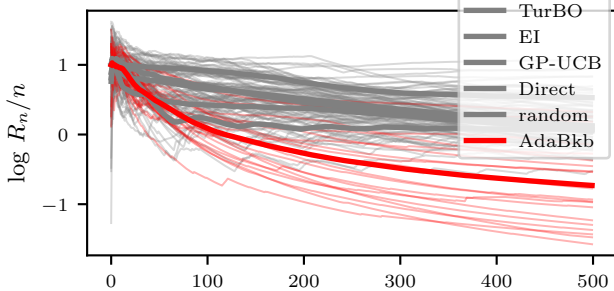

- GP-OO
- TurBO
- EI
- GP-UCB
- Direct
- random
- AdaBkb

Supplement: supplementary_material [file attachment]
